# Supplementary material for: Genomic Association Mapping of Apparent Amylose and Protein Concentration in Milled Rice
Source: MDPI journal article supplement (doi:10.3390/agronomy12040857), 2022-03-31
Supplement: s1 [file s1]

**Table S1.** Amylose and protein concentration of diverse rice accessions grown in Texas A&M AgriLife Research at Beaumont in 2018 and 2019.

|    | ID                | Amylose Concentration (%) |       | Protein Concentration (%) |       |
|----|-------------------|---------------------------|-------|---------------------------|-------|
|    |                   | 2018                      | 2019  | 2018                      | 2019  |
| 1  | 119A/170R         | 26.23                     | 19.58 | 5.46                      | 6.81  |
| 2  | 119A/173R         | 24.70                     | 20.65 | 5.52                      | 7.62  |
| 3  | 119B              | 32.88                     | 25.88 | 5.41                      | 10.71 |
| 4  | 152R              | 15.06                     | 11.68 | 5.75                      | 7.97  |
| 5  | 153R              | 14.96                     | 7.13  | 5.98                      | 9.04  |
| 6  | 163R              | 14.59                     | 12.04 | 6.40                      | 8.63  |
| 7  | 164R              | -                         | 23.51 | -                         | 9.01  |
| 8  | 170R              | 14.20                     | 9.71  | 6.02                      | 8.36  |
| 9  | 171R              | 16.65                     | 12.57 | 6.52                      | 7.65  |
| 10 | 172R              | 12.18                     | 8.06  | 5.41                      | 8.15  |
| 11 | 173R              | 15.44                     | 11.90 | 6.31                      | 8.45  |
| 12 | 329A/170R         | 25.47                     | 19.31 | 5.66                      | 8.15  |
| 13 | 329A/173R         | 22.76                     | 21.14 | 6.21                      | 8.60  |
| 14 | 329B              | -                         | 18.69 | -                         | 10.62 |
| 15 | 339A/170R         | 25.89                     | 20.70 | 4.32                      | 7.56  |
| 16 | 339A/173R         | 27.13                     | 20.03 | 5.55                      | 8.69  |
| 17 | 339B              | 31.44                     | 22.66 | 7.41                      | 11.81 |
| 18 | 435A/173R         | 25.99                     | 20.43 | 5.44                      | 7.50  |
| 19 | 435A/173R         | -                         | 18.51 | -                         | 8.15  |
| 20 | 435B              | 32.03                     | 24.18 | 6.52                      | 9.43  |
| 21 | 56-122-23         | 17.02                     | 15.47 | 5.14                      | 6.07  |
| 22 | 89-Y-235          | 19.57                     | 18.20 | 6.31                      | 6.99  |
| 23 | A 152             | 15.86                     | 14.18 | 5.53                      | 7.79  |
| 24 | Agostano          | 18.32                     | 16.77 | 5.33                      | 7.38  |
| 25 | Ai Yeh Lu         | 17.75                     | 16.81 | 5.40                      | 7.53  |
| 26 | Antonio           | 23.88                     | 22.35 | 6.60                      | 7.44  |
| 27 | Ardito            | 15.10                     | 13.46 | 6.11                      | 8.21  |
| 28 | B6616A4-22-Bk-5-4 | 23.26                     | 19.89 | 5.69                      | 8.30  |
| 29 | Baber             | 33.22                     | 26.59 | 5.83                      | 8.42  |
| 30 | Bamoa A75         | 31.06                     | 24.45 | 5.18                      | 6.84  |
| 31 | Bhim Dhan         | 24.87                     | 17.62 | 5.75                      | 6.75  |
| 32 | Biser 1           | 16.22                     | 13.82 | 5.06                      | 6.81  |
| 33 | Blue Rose Supreme | 17.60                     | 14.71 | 5.11                      | 5.96  |
| 34 | Blue Stick        | 22.54                     | 20.34 | 5.45                      | 5.76  |
| 35 | Bombilla          | 15.45                     | 13.55 | 5.64                      | 7.50  |
| 36 | Bombon            | 20.55                     | 16.19 | 7.71                      | 8.09  |
| 37 | Botika S/R        | 28.79                     | 23.29 | 6.63                      | 7.65  |

|    | ID                      | Amylose Concentration (%) |       | Protein Concentration (%) |       |
|----|-------------------------|---------------------------|-------|---------------------------|-------|
|    |                         | 2018                      | 2019  | 2018                      | 2019  |
| 38 | British Honduras Creole | 23.76                     | 18.02 | 6.01                      | 7.26  |
| 39 | Bul Zo                  | 16.86                     | 13.20 | 4.94                      | 5.84  |
| 40 | Buphopa                 | 11.98                     | 8.64  | 7.11                      | 9.34  |
| 41 | C 5560                  | 2.81                      | -     | 7.02                      | -     |
| 42 | C 8429                  | 20.92                     | 17.84 | 6.78                      | 6.28  |
| 43 | C4-63                   | 22.79                     | 11.23 | 8.15                      | 8.51  |
| 44 | C57-5043                | 24.12                     | -     | 5.47                      | -     |
| 45 | Calmochi-101            | 4.65                      | 1.99  | 5.26                      | 5.96  |
| 46 | Camponi SML             | 22.91                     | 17.97 | 7.26                      | 8.81  |
| 47 | Celiaj                  | 17.69                     | 11.01 | 7.91                      | 11.04 |
| 48 | Cenit                   | 17.65                     | 13.69 | 6.20                      | 7.76  |
| 49 | Chacareiro Uruguay      | 11.30                     | 9.40  | 6.14                      | 7.29  |
| 50 | Cheniere                | 32.17                     | 26.59 | 5.91                      | 7.56  |
| 51 | Chia Nung Yu 242        | 30.60                     | 24.40 | 7.08                      | 7.20  |
| 52 | Chunjiangzao No. 1      | 16.63                     | 10.25 | 6.05                      | 9.10  |
| 53 | Cocodrie                | 32.22                     | 23.91 | 6.28                      | 6.99  |
| 54 | Colorado                | 32.68                     | 26.50 | 6.10                      | 7.74  |
| 55 | Coppocina               | 23.76                     | 20.43 | 5.78                      | 6.49  |
| 56 | Criollo Chivacoa 2      | 19.71                     | 17.71 | 6.75                      | 7.68  |
| 57 | Csornuj                 | 16.22                     | 12.48 | 9.61                      | 10.62 |
| 58 | Cybonnet                | 22.95                     | 18.91 | 7.14                      | 9.19  |
| 59 | Cypress                 | 23.21                     | 17.71 | 6.37                      | 8.57  |
| 60 | Darmali                 | 20.48                     | -     | 7.85                      | -     |
| 61 | Della 2                 | 23.82                     | 17.04 | 6.22                      | 6.93  |
| 62 | Diamond                 | 22.90                     | 20.29 | 6.60                      | 7.29  |
| 63 | Early                   | 24.89                     | 16.59 | 6.00                      | 8.90  |
| 64 | Early Colusa            | 17.54                     | 13.78 | 5.66                      | 6.78  |
| 65 | Early Wataribune        | 20.25                     | 15.92 | 5.17                      | 6.19  |
| 66 | Edith                   | 13.88                     | 11.37 | 6.02                      | 7.26  |
| 67 | Edomen Scented          | 17.90                     | 14.36 | 5.30                      | 6.43  |
| 68 | Egyptian Wild Type      | 22.64                     | -     | 5.86                      | -     |
| 69 | El Paso L-144           | 30.41                     | 22.57 | 5.86                      | 8.27  |
| 70 | Erythroceros Hokkaido   | 15.95                     | 11.86 | 7.68                      | 10.06 |
| 71 | Ginmasari               | 13.37                     | 10.70 | 6.01                      | 7.82  |
| 72 | Gogo Lempuk             | 20.40                     | 16.32 | 7.02                      | 8.18  |
| 73 | GPNO 1106               | 26.34                     | 17.57 | 4.92                      | 7.11  |
| 74 | Guatemala 1021          | 20.00                     | 18.51 | 5.96                      | 7.02  |
| 75 | H57-3-1                 | 15.05                     | 13.11 | 5.24                      | 7.29  |
| 76 | Habiganj Boro 6         | 21.29                     | 19.54 | 6.66                      | 8.57  |

|     | ID                 | Amylose Concentration (%) |       | Protein Concentration (%) |      |
|-----|--------------------|---------------------------|-------|---------------------------|------|
|     |                    | 2018                      | 2019  | 2018                      | 2019 |
| 77  | Haginomae Mochi    | 0.78                      | 1.72  | 5.36                      | 5.85 |
| 78  | Hatsunishiki       | 15.33                     | 13.73 | 5.31                      | 6.99 |
| 79  | HB-6-2             | 11.84                     | 11.59 | 7.17                      | 7.68 |
| 80  | IAC 25             | 19.26                     | 17.21 | 6.18                      | 8.27 |
| 81  | IR 1321-12         | 12.33                     | 12.39 | 6.06                      | 7.11 |
| 82  | IR24               | 11.39                     | 10.43 | 6.43                      | 7.65 |
| 83  | IR-44595           | 29.44                     | 24.18 | 5.49                      | 9.10 |
| 84  | IR64               | 19.31                     | 15.83 | 5.46                      | 7.71 |
| 85  | IR64-Sub1          | 22.80                     | 17.39 | 6.60                      | 8.18 |
| 86  | IR72               | 26.26                     | 24.63 | 5.74                      | 7.05 |
| 87  | IRAT 177           | 13.02                     | 13.91 | 5.80                      | 6.75 |
| 88  | IRAT 44            | 12.19                     | 10.65 | 6.31                      | 7.47 |
| 89  | Italica Carolina   | 19.68                     | 16.01 | 7.94                      | 9.46 |
| 90  | J.P. 5             | 12.77                     | 12.93 | 5.62                      | 5.81 |
| 91  | Jefferson          | 18.93                     | 17.26 | 6.16                      | 7.53 |
| 92  | Jouiku 393G        | 12.01                     | 17.44 | 5.77                      | 8.24 |
| 93  | Kamenoo            | 13.69                     | 13.29 | 5.33                      | 7.11 |
| 94  | Karabaschak        | 16.44                     | -     | 6.66                      | -    |
| 95  | Karang Serang      | 16.36                     | 16.28 | 7.68                      | 7.59 |
| 96  | Katy               | 21.30                     | 20.34 | 6.90                      | 6.72 |
| 97  | Kaukkyi Ani        | 17.13                     | 17.71 | 8.27                      | 8.45 |
| 98  | Kaybonnet          | 23.41                     | 19.98 | 6.07                      | 8.06 |
| 99  | Khao Luang         | 3.86                      | -     | 6.28                      | -    |
| 100 | Khao Phoi          | 3.88                      | 5.83  | 7.71                      | 7.53 |
| 101 | Kiuki No. 46       | 13.42                     | 15.21 | 5.24                      | 6.78 |
| 102 | Koshihikari        | 14.93                     | 15.38 | 6.13                      | 5.70 |
| 103 | Krasnodarskij 3352 | 16.34                     | 14.67 | 6.46                      | 7.41 |
| 104 | Krasnodarskij 424  | 17.28                     | 15.07 | 5.81                      | 6.93 |
| 105 | L-201              | 18.15                     | 17.30 | 5.99                      | 7.76 |
| 106 | L-202              | 26.06                     | 23.46 | 5.22                      | 8.93 |
| 107 | L-203              | 29.20                     | 26.05 | 5.47                      | 8.12 |
| 108 | LAC 23             | 21.54                     | 19.76 | 5.79                      | 7.11 |
| 109 | Lacassine          | 21.30                     | 21.10 | 6.66                      | 7.02 |
| 110 | Lady Wright Seln   | 11.78                     | 12.84 | 5.28                      | 7.14 |
| 111 | LaGrue             | 19.72                     | 20.16 | 6.46                      | 6.93 |
| 112 | LaKast             | 19.53                     | 20.34 | 6.78                      | 7.82 |
| 113 | Leah               | 19.93                     | 21.63 | 6.52                      | 6.84 |
| 114 | Lebonnet           | 17.95                     | 20.16 | 5.36                      | 7.68 |
| 115 | Lemont             | 17.86                     | 18.15 | 6.41                      | 7.68 |

|     | ID                  | Amylose Concentration (%) |       | Protein Concentration (%) |       |
|-----|---------------------|---------------------------|-------|---------------------------|-------|
|     |                     | 2018                      | 2019  | 2018                      | 2019  |
| 116 | LGRU 2              | 19.71                     | -     | 6.78                      | -     |
| 117 | Ligerito            | 19.58                     | 16.72 | 5.36                      | 6.90  |
| 118 | Lua Chua Chan       | 21.58                     | -     | 7.76                      | -     |
| 119 | Luk Takhar          | 15.55                     | 15.38 | 4.83                      | 6.46  |
| 120 | Lusitano            | 14.33                     | 14.09 | 7.94                      | 7.97  |
| 121 | M-201               | 9.08                      | 8.64  | 7.29                      | 9.88  |
| 122 | M-202               | 8.74                      | 9.00  | 5.38                      | 7.53  |
| 123 | M-203               | 11.13                     | 10.65 | 5.94                      | 8.45  |
| 124 | M-204               | 12.28                     | 21.28 | 5.25                      | 7.76  |
| 125 | M-401               | 11.27                     | 10.34 | 5.44                      | 7.05  |
| 126 | Mars                | 10.68                     | 10.29 | 6.63                      | 7.76  |
| 127 | Mercury             | 10.15                     | 10.25 | 6.34                      | 7.65  |
| 128 | Minghui 63          | 10.58                     | 8.15  | 6.28                      | 6.52  |
| 129 | Mojito Colorado     | 19.37                     | 16.81 | 6.81                      | 6.49  |
| 130 | Moroberekan         | 27.78                     | -     | 6.40                      | -     |
| 131 | N22                 | 25.92                     | 21.63 | 6.34                      | 10.71 |
| 132 | Nanton No. 131      | 18.37                     | 0.61  | 5.52                      | 8.15  |
| 133 | Newbonnet           | 20.18                     | 17.53 | 6.10                      | 8.06  |
| 134 | Nipponbare          | 13.99                     | 13.20 | 6.19                      | 5.74  |
| 135 | Niwahutaw Mochi     | 0.39                      | 2.26  | 5.71                      | 6.07  |
| 136 | Nortai              | 14.01                     | 11.28 | 5.53                      | 6.81  |
| 137 | Nova                | 13.81                     | 10.96 | 6.22                      | 6.96  |
| 138 | Noventa Dias Blanco | 21.62                     | 18.29 | 5.77                      | 6.22  |
| 139 | NSF-TV 107          | 21.42                     | 17.84 | 6.16                      | 7.97  |
| 140 | Oryzica Llanos 4    | 29.63                     | 26.05 | 6.46                      | 7.56  |
| 141 | Oryzica Llanos 5    | 25.61                     | 23.11 | 9.43                      | 10.83 |
| 142 | OS 6 (WC 10296)     | 20.53                     | 18.69 | 5.72                      | 6.84  |
| 143 | Padi Pohon Batu     | 20.23                     | 16.77 | 6.55                      | 7.23  |
| 144 | Palmyra             | 15.07                     | 14.36 | 5.91                      | 5.93  |
| 145 | Panda               | 14.58                     | 11.41 | 6.12                      | 8.36  |
| 146 | Pergonil 15         | 14.96                     | 15.07 | 5.93                      | 6.81  |
| 147 | Presidio            | 21.53                     | 19.63 | 5.68                      | 7.23  |
| 148 | Quinimpol           | 2.67                      | 2.66  | 7.91                      | 7.91  |
| 149 | R 101               | 10.77                     | 8.87  | 7.11                      | 8.45  |
| 150 | R 67                | 23.28                     | 16.59 | 5.99                      | 8.45  |
| 151 | R 75                | 22.31                     | 16.23 | 5.88                      | 6.52  |
| 152 | Ragasu              | 15.57                     | 12.48 | 5.72                      | 6.49  |
| 153 | RD 218              | 15.29                     | 11.10 | 6.69                      | 7.11  |
| 154 | Rex                 | 20.67                     | 17.66 | 5.58                      | 6.19  |

|     | ID               | Amylose Concentration (%) |       | Protein Concentration (%) |       |
|-----|------------------|---------------------------|-------|---------------------------|-------|
|     |                  | 2018                      | 2019  | 2018                      | 2019  |
| 155 | Rico 1           | 14.67                     | 13.55 | 5.20                      | 5.90  |
| 156 | Romanica         | 19.06                     | 15.52 | 7.68                      | 8.87  |
| 157 | Romeno           | 32.01                     | -     | 5.66                      | -     |
| 158 | Romeo            | 13.99                     | 13.51 | 5.77                      | 7.65  |
| 159 | Rondo            | 29.94                     | 24.49 | 6.81                      | 7.62  |
| 160 | Roy J            | 23.08                     | 17.93 | 5.64                      | 6.90  |
| 161 | RT 1031-69       | 29.76                     | 24.58 | 7.02                      | 9.19  |
| 162 | RU-1003098       | 21.21                     | 18.64 | 6.28                      | 8.06  |
| 163 | RU-1003123       | 31.56                     | 24.94 | 7.32                      | 7.35  |
| 164 | RU-1303181       | 29.32                     | 24.54 | 6.60                      | 7.29  |
| 165 | RU-1303184       | 23.29                     | 14.98 | 6.84                      | 8.95  |
| 166 | RU-1403138       | 31.57                     | 20.74 | 6.43                      | 7.41  |
| 167 | RU-1403141       | 22.06                     | 16.50 | 6.42                      | 7.76  |
| 168 | RU-1403166       | 20.80                     | 18.73 | 7.38                      | 7.50  |
| 169 | RU-1503110       | 11.53                     | 7.97  | 7.85                      | 10.20 |
| 170 | RU-1503147       | 31.95                     | 22.93 | 5.98                      | 7.17  |
| 171 | RU-1603126       | 22.32                     | 16.32 | 6.01                      | 8.63  |
| 172 | RU-1603150       | 22.45                     | -     | 6.52                      | -     |
| 173 | RU-903147        | 27.37                     | 23.73 | 6.49                      | 6.90  |
| 174 | Saber            | 18.68                     | 10.25 | 7.68                      | 6.93  |
| 175 | Sabine           | 29.36                     | 24.22 | 6.37                      | 6.93  |
| 176 | Sathi            | 13.25                     | 11.37 | 7.23                      | 8.06  |
| 177 | Saturn           | 11.16                     | 10.92 | 6.43                      | 8.72  |
| 178 | Secano do Brazil | 14.96                     | 11.72 | 5.50                      | 6.57  |
| 179 | Sel. No. 388     | 11.87                     | 10.16 | 5.30                      | 5.95  |
| 180 | Shimizu Mochi    | 1.59                      | 0.87  | 5.65                      | 7.26  |
| 181 | Shinriki         | 15.23                     | 15.07 | 5.41                      | 5.08  |
| 182 | Shirogane        | 14.08                     | 17.39 | 5.89                      | 8.81  |
| 183 | Short Grain      | 29.93                     | 24.22 | 7.76                      | 9.40  |
| 184 | Simpor           | 20.98                     | 18.15 | 6.37                      | 6.43  |
| 185 | Sipirasikkam     | 20.77                     | 20.29 | 6.16                      | 5.57  |
| 186 | Sml Kapuri       | 23.83                     | 21.41 | 5.74                      | 7.85  |
| 187 | Somewake         | 17.24                     | 13.78 | 5.92                      | 7.59  |
| 188 | Sri Malaysia Dua | 17.76                     | 13.15 | 6.39                      | 7.47  |
| 189 | Sultani          | 13.71                     | 10.88 | 6.13                      | 9.52  |
| 190 | Sung Liao 2      | 15.10                     | 10.74 | 5.80                      | 6.90  |
| 191 | Suweon           | 15.97                     | 13.38 | 6.13                      | 5.81  |
| 192 | Ta Hung Ku       | 20.81                     | 16.77 | 7.02                      | 9.49  |
| 193 | Taichu Mochi 59  | 23.10                     | 17.53 | 6.69                      | 7.79  |

|     | ID                 | Amylose Concentration (%) |       | Protein Concentration (%) |       |
|-----|--------------------|---------------------------|-------|---------------------------|-------|
|     |                    | 2018                      | 2019  | 2018                      | 2019  |
| 194 | Tainan-Iku No. 512 | 17.32                     | 15.03 | 6.13                      | 5.65  |
| 195 | Taipei 309         | 17.40                     | 15.12 | 5.20                      | 5.25  |
| 196 | Takao No. 25       | 16.13                     | 12.57 | 5.57                      | 5.88  |
| 197 | Takao-Iku No. 44   | 16.71                     | 12.62 | 4.93                      | 6.21  |
| 198 | Takao-Iku No. 8    | 18.65                     | 14.49 | 5.58                      | 5.97  |
| 199 | Tamanishiki        | 16.66                     | 11.95 | 5.33                      | 6.28  |
| 200 | Terso              | 13.35                     | 10.29 | 5.58                      | 6.43  |
| 201 | Thad               | 28.87                     | 22.79 | 6.25                      | 6.84  |
| 202 | Tia Bura           | 24.82                     | 19.76 | 6.57                      | 7.02  |
| 203 | Titan              | 13.62                     | 11.68 | 5.86                      | 7.17  |
| 204 | Tokyo Shino Mochi  | 1.92                      | 0.00  | 5.61                      | 7.62  |
| 205 | Tox 782-20-1       | 21.64                     | 19.36 | 5.21                      | 6.78  |
| 206 | Upland             | 25.62                     | 15.79 | 5.80                      | 7.08  |
| 207 | UZ ROSZ M38        | 27.78                     | 22.17 | 8.63                      | 8.81  |
| 208 | Vary Tarva Osla    | 15.80                     | 11.81 | 6.43                      | 7.85  |
| 209 | Very Early M9      | 13.13                     | 9.36  | 4.94                      | 7.68  |
| 210 | WAB462-10-3-1      | 20.28                     | 17.66 | 6.66                      | 8.18  |
| 211 | WC 2811            | 23.61                     | 17.21 | 6.84                      | 7.68  |
| 212 | WC 3397            | 13.77                     | 10.92 | 5.61                      | 7.59  |
| 213 | WC 3532            | 23.86                     | -     | 6.30                      | -     |
| 214 | WC 4443            | 22.27                     | 16.63 | 6.25                      | 5.78  |
| 215 | WC 6               | 4.79                      | 0.70  | 6.04                      | 7.14  |
| 216 | Wells              | 24.75                     | 18.60 | 6.13                      | 7.05  |
| 217 | WIR 3039           | 20.49                     | -     | 6.40                      | -     |
| 218 | WW 8/2290          | 28.72                     | 26.28 | 8.09                      | 9.64  |
| 219 | Yong Chal Byo      | 15.46                     | 10.34 | 5.74                      | 10.20 |
| 220 | Zhenshan 2         | 29.90                     | 22.35 | 6.60                      | 9.91  |

**Table S2.** List of gene models located within 100 kilobase pairs of SNPs significantly associated with milled grain protein and apparent amylose concentrations from the 2018 and 2019 seasons.

| Trait (Season)                     | SNP          | Gene Model<br>(within<br>100kbp) | Function (RAP-DB)                                                                                                                                                                                                      |
|------------------------------------|--------------|----------------------------------|------------------------------------------------------------------------------------------------------------------------------------------------------------------------------------------------------------------------|
| Protein<br>concentration<br>(2018) | S01_36225938 | Os01g0811100                     | ubiquitin-dependent protein catabolic process, proteolysis involved in cellular protein catabolic process, endopeptidase activity, threonine-type endopeptidase activity                                               |
|                                    |              | Os01g0811300                     | DNA methylation reader, <b>Response to salt stress</b> , histone-lysine N-methyltransferase activity                                                                                                                   |
|                                    |              | Os01g0812000                     | <b>Transcriptional activator of gibberellin-dependent alpha-amylase expression, regulation of nutrient mobilization in germination</b>                                                                                 |
|                                    | S02_12644707 | Os02g0317500                     | Cyclin-like F-box domain containing protein                                                                                                                                                                            |
|                                    |              | Os02g0317400                     | transport protein, longin-like domain containing protein                                                                                                                                                               |
|                                    | S02_26708951 | Os02g0644000                     | Proteolysis, cysteine-type endopeptidase activity                                                                                                                                                                      |
|                                    |              | Os02g0643200                     | Transcription factor, DNA-binding intermediate protein for SLR1, <b>Modulation of gibberellin signaling pathway, Regulation of plant growth and development</b>                                                        |
|                                    |              | Os02g0643000                     | Structural molecule activity, Vesicle-associated membrane protein                                                                                                                                                      |
|                                    |              | Os02g0642700                     | Lipopolysaccharide-modifying protein, CAP10-like family protein                                                                                                                                                        |
|                                    | S04_28680892 | Os04g0563000                     | GDP-fucose protein O-fucosyltransferase                                                                                                                                                                                |
|                                    |              | Os04g0562100                     | Amino acid transporter, transmembrane domain containing protein                                                                                                                                                        |
|                                    |              | Os04g0561900                     | Peptidase S9A, prolyl oligopeptidase family protein; oxidation-reduction process                                                                                                                                       |
|                                    | S08_17703647 | Os08g0374800                     | UDP-glucose epimerase, modulation of cellulose biosynthesis and wall assembly, Cell wall formation and photosynthesis, <b>galactose metabolic process</b>                                                              |
|                                    |              | Os08g0376300                     | protein phosphorylation, protein serine/threonine kinase activity, protein binding, ATP binding, transferase activity, transferring phosphorus-containing groups, Similar to Leucine-rich receptor-like protein kinase |
|                                    |              | Os08g0375400                     | <b>Plant disease resistance response protein</b>                                                                                                                                                                       |
|                                    | S10_7561107  | Os10g0208600                     | Pollen Ole e 1 allergen/extensin domain containing protein                                                                                                                                                             |
|                                    |              | Os10g0208200                     | GTP catabolic process, intracellular protein transport , signal transduction, Similar to ras-like                                                                                                                      |

| Trait (Season)                  | SNP          | Gene Model<br>(within<br>100kbp) | Function (RAP-DB)                                                                                                           |
|---------------------------------|--------------|----------------------------------|-----------------------------------------------------------------------------------------------------------------------------|
|                                 | S10_10978682 | Os10g0349400                     | lipid transport, Plant lipid transfer protein/seed storage/trypsin-alpha amylase inhibitor                                  |
|                                 |              | Os10g0350450                     | translation, structural constituent of ribosome, Similar to 40S ribosomal protein S23                                       |
|                                 | S10_21407969 | Os10g0536100                     | MIKC-type MADS-box protein, Long day (LD)-specific negative regulator of flowering                                          |
|                                 |              | Os10g0536500                     | Peptidase S10, serine carboxypeptidase                                                                                      |
|                                 |              | Os10g0537800                     | Peptidase aspartic, catalytic domain containing protein                                                                     |
|                                 | S10_21408016 | Os10g0536100                     | MIKC-type MADS-box protein, Long day (LD)-specific negative regulator of flowering                                          |
|                                 |              | Os10g0536500                     | Peptidase S10, serine carboxypeptidase                                                                                      |
|                                 |              | Os10g0536700                     | <b>response to oxidative stress</b> , oxidation-reduction process, peroxidase activity                                      |
|                                 |              | Os10g0537800                     | Peptidase aspartic, catalytic domain containing protein, proteolysis, aspartic-type endopeptidase activity                  |
|                                 | S11_15568406 | Os11g0425100                     | Peptidase C1A, papain family protein, cysteine-type peptidase activity                                                      |
| Protein concentration<br>(2019) | S01_32198354 | Os01g0729600                     | Pyridoxal phosphate-dependent transferase                                                                                   |
|                                 |              | Os01g0730100                     | Cyclin-like F-box domain containing protein                                                                                 |
|                                 |              | Os01g0730300                     | <b>trehalose biosynthetic process</b>                                                                                       |
|                                 |              | Os01g0730900                     | DNA polymerase III, subunits gamma and tau domain containing protein, DNA replication, DNA-directed DNA polymerase activity |
|                                 | S02_6959467  | Os02g0224100                     | Protein phosphatase 2C domain containing protein                                                                            |
|                                 |              | Os02g0224200                     | Similar to Ser/Thr specific protein phosphatase 2A B regulatory subunit beta isoform, signal transduction, protein binding  |
|                                 | S02_14624561 | Os02g0435000                     | Translocation protein Sec62 family protein, protein transporter activity                                                    |
|                                 |              | Os02g0436400                     | NAD(P)-binding domain containing protein, lysine biosynthetic process via diaminopimelate, oxidation-reduction process      |
|                                 | S02_25383967 | Os02g0617600                     | Protein phosphatase 2A, regulatory subunit PR55 domain containing protein                                                   |
|                                 |              | Os02g0618200                     | Signal transduction response regulator                                                                                      |
|                                 | S04_32077706 | Os04g0621500                     | <b>Disease resistance protein domain containing protein, defense response</b>                                               |
|                                 | S04_32077761 | Os04g0620700                     | Nucleolin-like protein, <b>Salt stress response</b>                                                                         |
|                                 | S04_32077827 | Os04g0620400                     | SIT4 phosphatase-associated protein family                                                                                  |



| Trait (Season) | SNP          | Gene Model<br>(within<br>100kbp) | Function (RAP-DB)                                                                                                                                                  |
|----------------|--------------|----------------------------------|--------------------------------------------------------------------------------------------------------------------------------------------------------------------|
|                | S04_27933097 | Os04g0547600                     | <b>Pathogenesis-related transcriptional factor and ERF</b><br>domain containing protein                                                                            |
|                |              | Os04g0547900                     | Anti-sense to fibroblast growth factor protein GFG<br>family protein                                                                                               |
|                |              | Os04g0548300                     | Armadillo-type fold domain containing protein                                                                                                                      |
|                |              | Os04g0548400                     | Protein kinase, core domain containing protein                                                                                                                     |
|                | S04_17895938 | Os04g0366000                     | protein serine/threonine kinase activity                                                                                                                           |
|                | S05_27184717 | Os05g0545200                     | Similar to zinc ion binding, protein binding                                                                                                                       |
|                |              | Os05g0545000                     | Similar to Phosphatidylinositol transfer-like protein<br>IV, transporter activity                                                                                  |
|                | S06_31841867 | Os06g0727200                     | <b>response to oxidative stress</b> , catalase activity                                                                                                            |
|                |              | Os06g0727300                     | Similar to glycosyltransferase                                                                                                                                     |
|                |              | Os06g0727400                     | Similar to Protein kinase APK1A, chloroplast<br>precursor                                                                                                          |
|                | S07_23761720 | Os07g0572100                     | Similar to Amine oxidase like protein, quinone<br>binding, cellular amine metabolic process                                                                        |
|                |              | Os07g0572800                     | Similar to MAP kinase-like protein, protein<br>serine/threonine kinase activity                                                                                    |
|                | S07_25039822 | Os07g0597200                     | Protein kinase, core domain containing protein,<br>protein serine/threonine kinase activity                                                                        |
|                | S07_25039804 | Os07g0597500                     | NAD(P)-binding domain containing protein,<br>oxidation-reduction process                                                                                           |
|                |              | Os07g0598100                     | Similar to Hydroxyproline-rich glycoprotein DZ-<br>HRGP precursor, RNA methyltransferase activity                                                                  |
|                |              | Os07g0598300                     | DNA binding protein, DEAD-like helicase                                                                                                                            |
|                | S07_27349671 | Os07g0640200                     | <b>Carbohydrate kinase</b> , FGGY family protein,<br><b>carbohydrate metabolic process</b>                                                                         |
|                | S07_27345896 | Os07g0642400                     | Similar to chromatin remodeling complex subunit,<br>nucleic acid binding, hydrolase activity, acting on<br>acid anhydrides, in phosphorus-containing<br>anhydrides |
|                | S08_15381100 | Os08g0338900                     | Similar to enhancer of polycomb-like protein101                                                                                                                    |
|                |              | Os08g0339200                     | hydrolase activity, acting on ester bonds                                                                                                                          |
|                |              | Os09g0385700                     | Zinc finger, AN1-type domain containing protein                                                                                                                    |
|                | S09_15114981 | Os09g0407950                     | Similar to transducin family protein / WD-40 repeat<br>family protein                                                                                              |
|                |              | Os09g0407900                     | Peptidase C19, ubiquitin carboxyl-terminal<br>hydrolase 2 family protein                                                                                           |
|                |              | Os09g0407200                     | proteasomal ubiquitin-dependent protein catabolic<br>process, damaged DNA binding                                                                                  |

| Trait (Season)                  | SNP          | Gene Model<br>(within<br>100kbp) | Function (RAP-DB)                                                                                                                            |
|---------------------------------|--------------|----------------------------------|----------------------------------------------------------------------------------------------------------------------------------------------|
|                                 | S09_23506233 | Os09g0567400                     | Histidine phosphotransfer protein, <b>Cytokinin signaling and stress response</b> , signal transducer activity                               |
|                                 |              | Os09g0567300                     | <b>Monodehydroascorbate reductase, Tolerance to ROS-induced oxidative stress</b>                                                             |
|                                 |              | Os09g0566550                     | Similar to serine/threonine protein kinase 1, CTR1, protein serine/threonine kinase activity, protein phosphorylation                        |
|                                 | S11_4473024  | Os11g0187500                     | <b>Similar to Heat shock protein 70</b>                                                                                                      |
|                                 | S11_24669964 | Os11g0591200                     | Similar to Beta-ketoacyl-CoA-synthase, fatty acid biosynthetic process                                                                       |
|                                 |              | Os11g0592100                     | <b>defense response to bacterium, defense response to fungus</b> , chitinase activity                                                        |
|                                 | S12_26658863 | Os12g0621500                     | protein phosphorylation, transferase activity, transferring phosphorus-containing groups                                                     |
|                                 |              | Os12g0621000                     | ubiquitin-dependent protein catabolic process, Similar to Ubiquitin carboxyl-terminal hydrolase                                              |
|                                 |              | Os12g0621100                     | Similar to Filamentous flower-like yabby protein, DNA and protein binding                                                                    |
|                                 |              | Os12g0621300                     | Zinc finger, PMZ-type domain containing protein, zinc ion binding                                                                            |
|                                 |              | Os12g0621900                     | Similar to Mov34/MPN/PAD-1 family protein                                                                                                    |
| Amylose concentration<br>(2018) | S04_29329808 | Os04g0571800                     | Zinc finger, RING/FYVE/PHD-type domain containing protein                                                                                    |
|                                 |              | Os04g0572700                     | Similar to DNA-directed RNA polymerase, nucleic acid binding, zinc ion binding                                                               |
|                                 |              | Os04g0573000                     | SPX-MFS protein, Phosphate transporter, Pi homeostasis, transmembrane transport                                                              |
|                                 |              | Os04g0573200                     | Copper chaperone for superoxide dismutase, Target of miR398b, Resistance to rice blast disease, superoxide metabolic process                 |
|                                 |              | Os04g0573300                     | proteolysis, serine-type endopeptidase activity                                                                                              |
|                                 | S07_11216782 | Os07g0288700                     | Similar to white-brown-complex ABC transporter family, nucleoside-triphosphatase activity, nucleotide binding                                |
|                                 | S08_22987802 | Os08g0465800                     | Similar to Glutamate decarboxylase, glutamate metabolic process, carboxylic acid metabolic process                                           |
| Amylose Concentration<br>(2019) | S01_253310   | Os01g0104600                     | Homolog of Arabidopsis DE-ETIOLATED1 (DET1), Modulation of the ABA signaling pathway and ABA biosynthesis, Regulation of chlorophyll content |
|                                 | S01_253309   | Os01g0103900                     | Polynucleotidyl transferase, Ribonuclease H fold domain containing protein                                                                   |

| Trait (Season) | SNP          | Gene Model<br>(within<br>100kbp) | Function (RAP-DB)                                                                                                     |
|----------------|--------------|----------------------------------|-----------------------------------------------------------------------------------------------------------------------|
|                |              | Os01g0104000                     | C-type lectin domain containing protein, protein phosphorylation, protein kinase activity                             |
|                |              | Os01g0104800                     | Sas10/Utp3 family protein, gene silencing                                                                             |
|                |              | Os01g0105400                     | Similar to Kinesin heavy chain                                                                                        |
|                |              | Os01g0752200                     | Enoyl-CoA hydratase/isomerase, Regulation of grain number and the yield, 3-hydroxyisobutyryl-CoA hydrolase activity   |
|                | S09_9767891  | Os09g0319800                     | Terpene synthase-like domain containing protein, Terpenoid cylases/protein prenyltransferase alpha-alpha toroid       |
|                | S10_10340782 | Os10g0339400                     | IQ calmodulin-binding region domain containing protein                                                                |
|                |              | Os10g0339600                     | Similar to Alpha-1,2-fucosidase, carbohydrate metabolic process, hydrolase activity, hydrolyzing O-glycosyl compounds |
|                | S11_14759126 | Os11g0414000                     | eIF4-gamma/eIF5/eIF2-epsilon domain containing protein, RNA metabolic process                                         |
